# Supplementary figures and images for: PrimerSeq: Design and Visualization of RT-PCR Primers for Alternative Splicing Using RNA-seq Data
Source: PubMed Central journal article supplement — Genomics Proteomics Bioinformatics. 2014 Apr 18;12(2):105–9. doi: 10.1016/j.gpb.2014.04.001 (PMC4411361; doi:10.1016/j.gpb.2014.04.001), 2014-04-18

**A**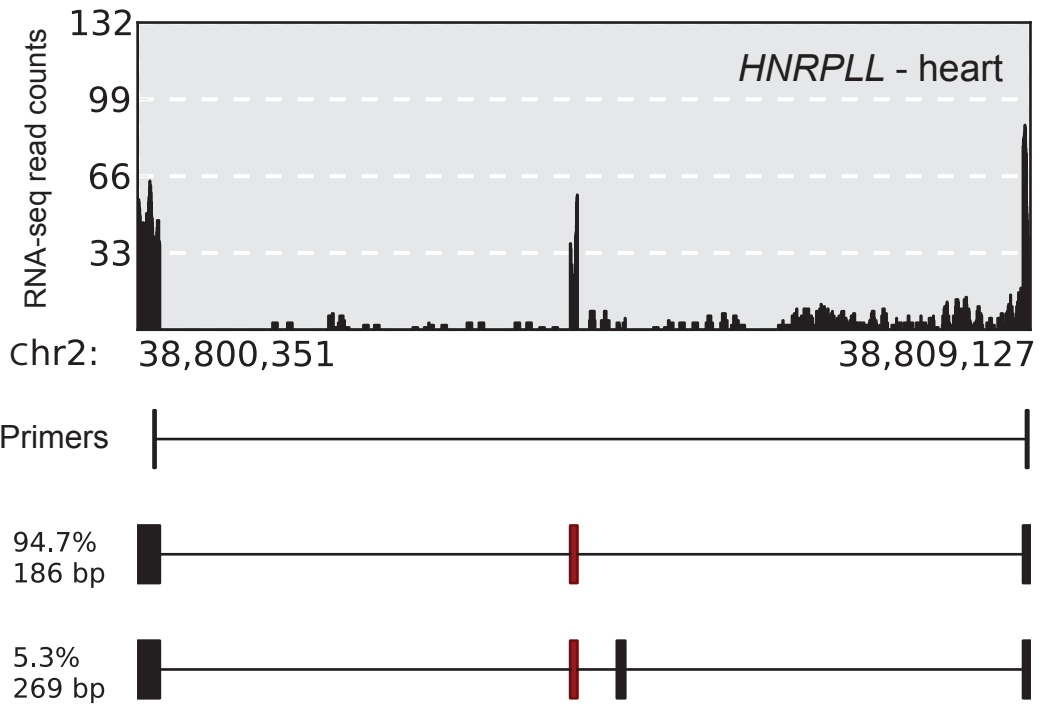**B**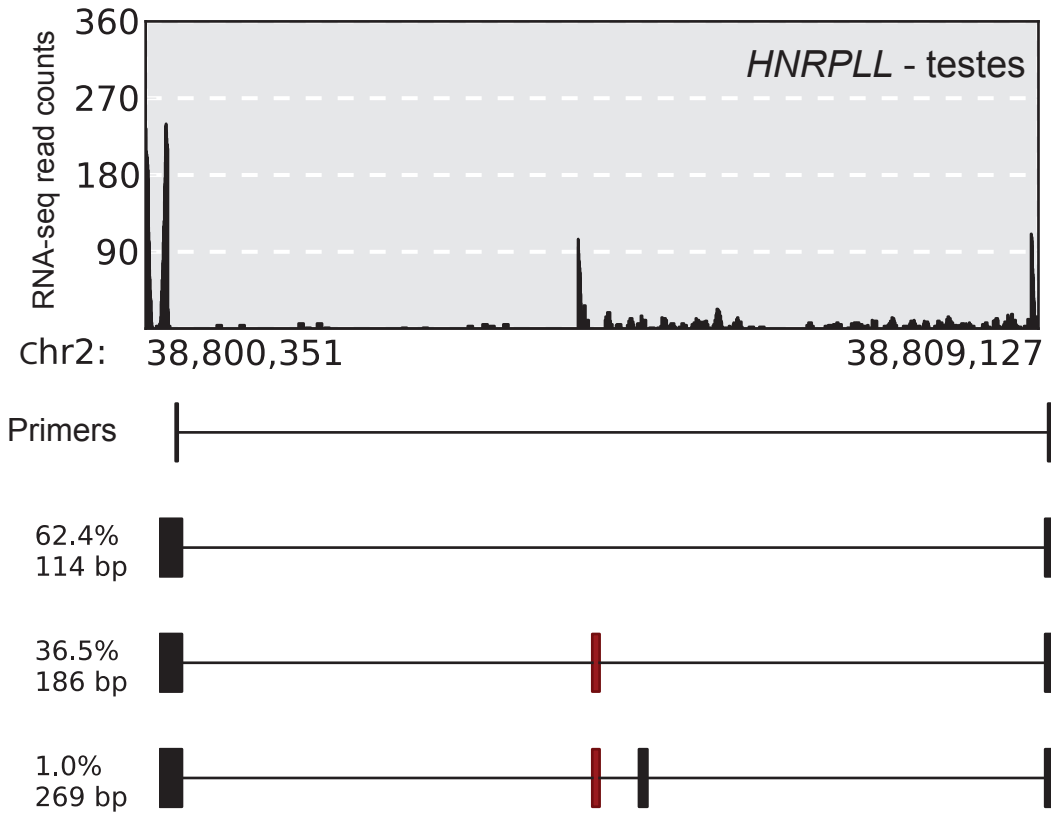**C**

*HNRPLL*  
-Chr2:38804602-38804674

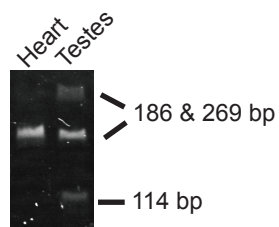

Supplement: mmc2.pdf [file mmc2.pdf]

**A**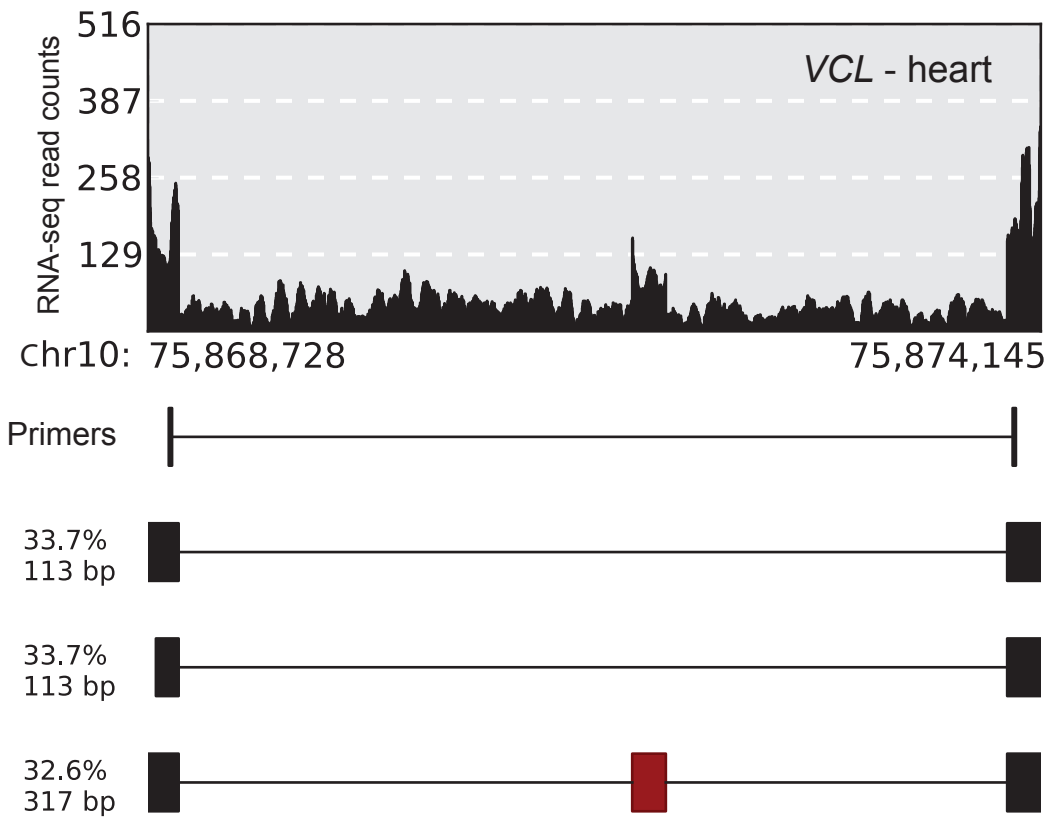**B**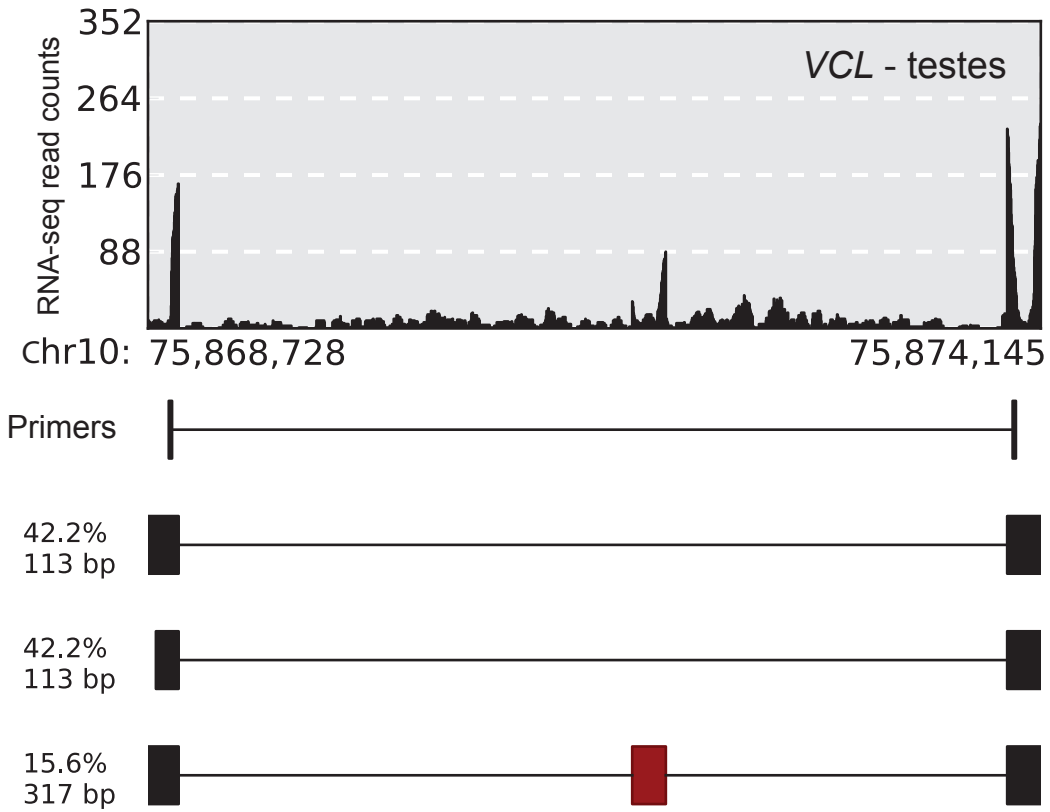**C**

VCL  
+Chr10:75871666-75871870

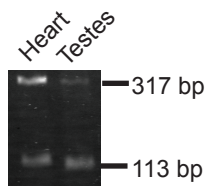

Supplement: mmc3.pdf [file mmc3.pdf]

A

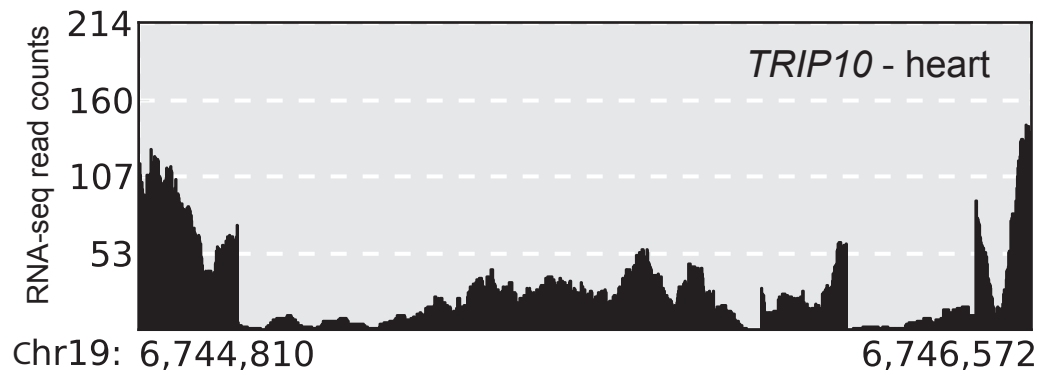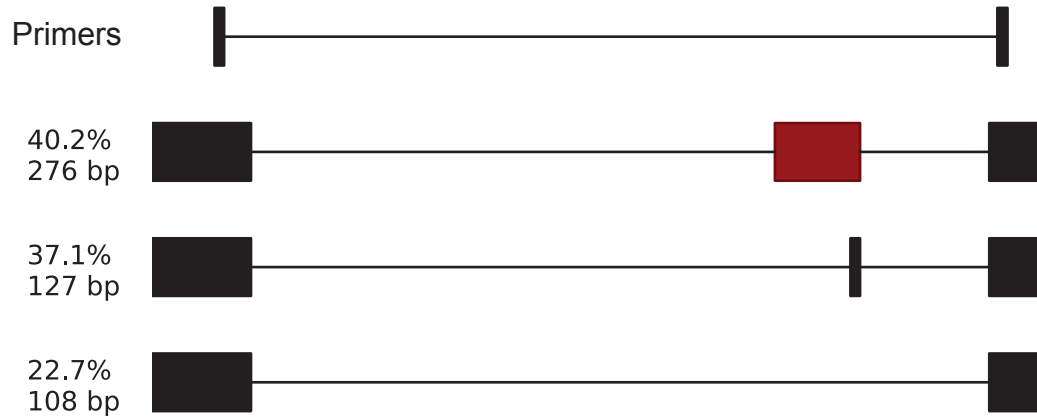

B

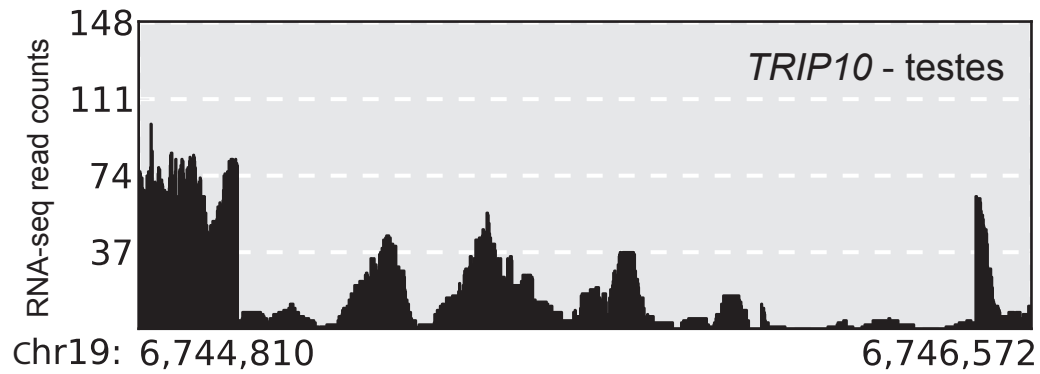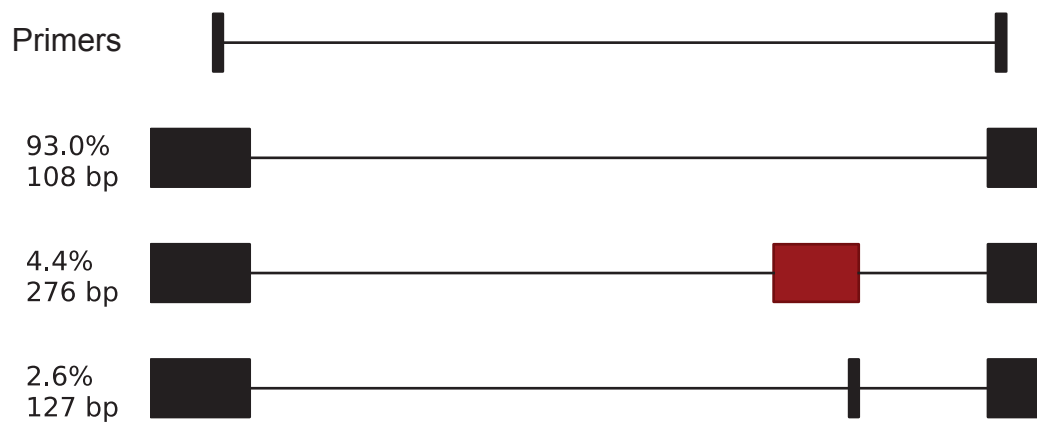

C

*TRIP10*  
+Chr19:6746039-6746207

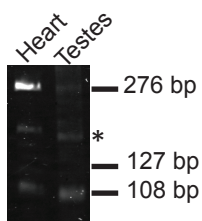

Supplement: mmc4.pdf [file mmc4.pdf]

A

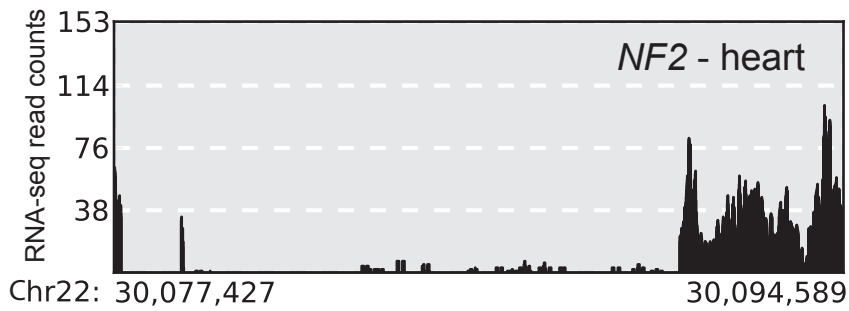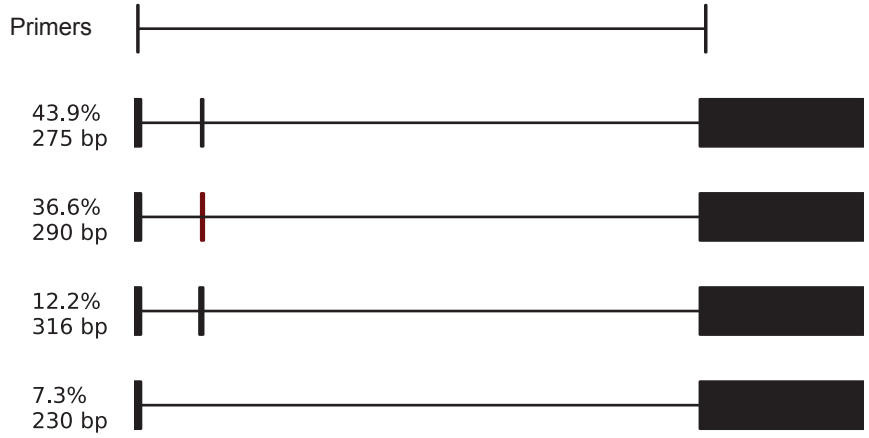

B

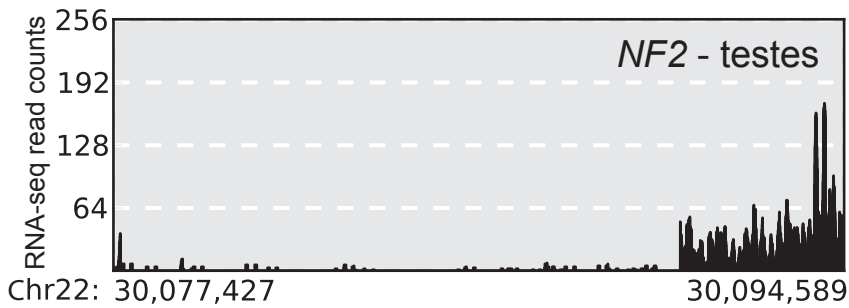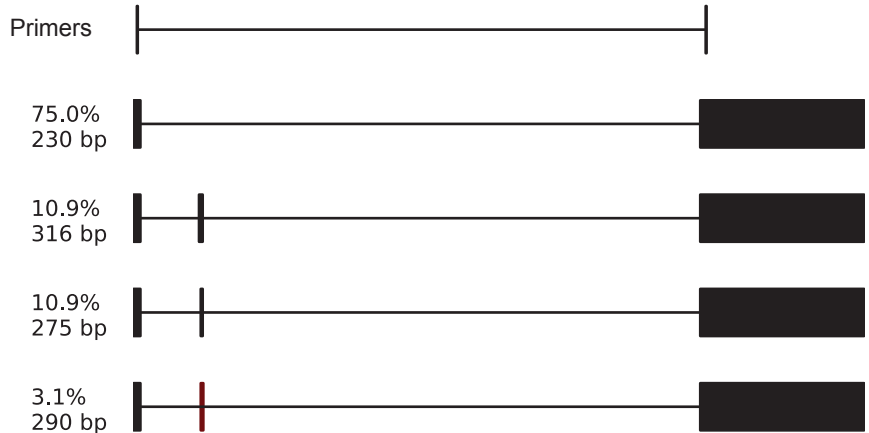

C

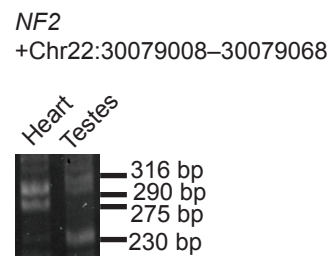

Supplement: mmc5.pdf [file mmc5.pdf]
